# Supplementary material
Source: bioRxiv or medRxiv preprint supplement (https://www.medrxiv.org/highwire/filestream/94372/field_highwire_adjunct_files/0/bmjopen-2012-001663supp1.pdf)
Supplement: Supplementary file [file bmjopen-2012-001663supp1.pdf]

## **Evidence of SARS-CoV-2 transcriptional activity in cardiomyocytes of COVID-19 patients without clinical signs of cardiac involvement**

Gaetano Pietro Bulfamante<sup>\*</sup>, Gianluca Lorenzo Perrucci<sup>\*✉</sup>, Monica Falleni, Elena Sommariva, Delfina Tosi, Carla Martinelli, Paola Songia, Paolo Poggio, Stefano Carugo, and Giulio Pompilio

### ***Supplementary Figures***

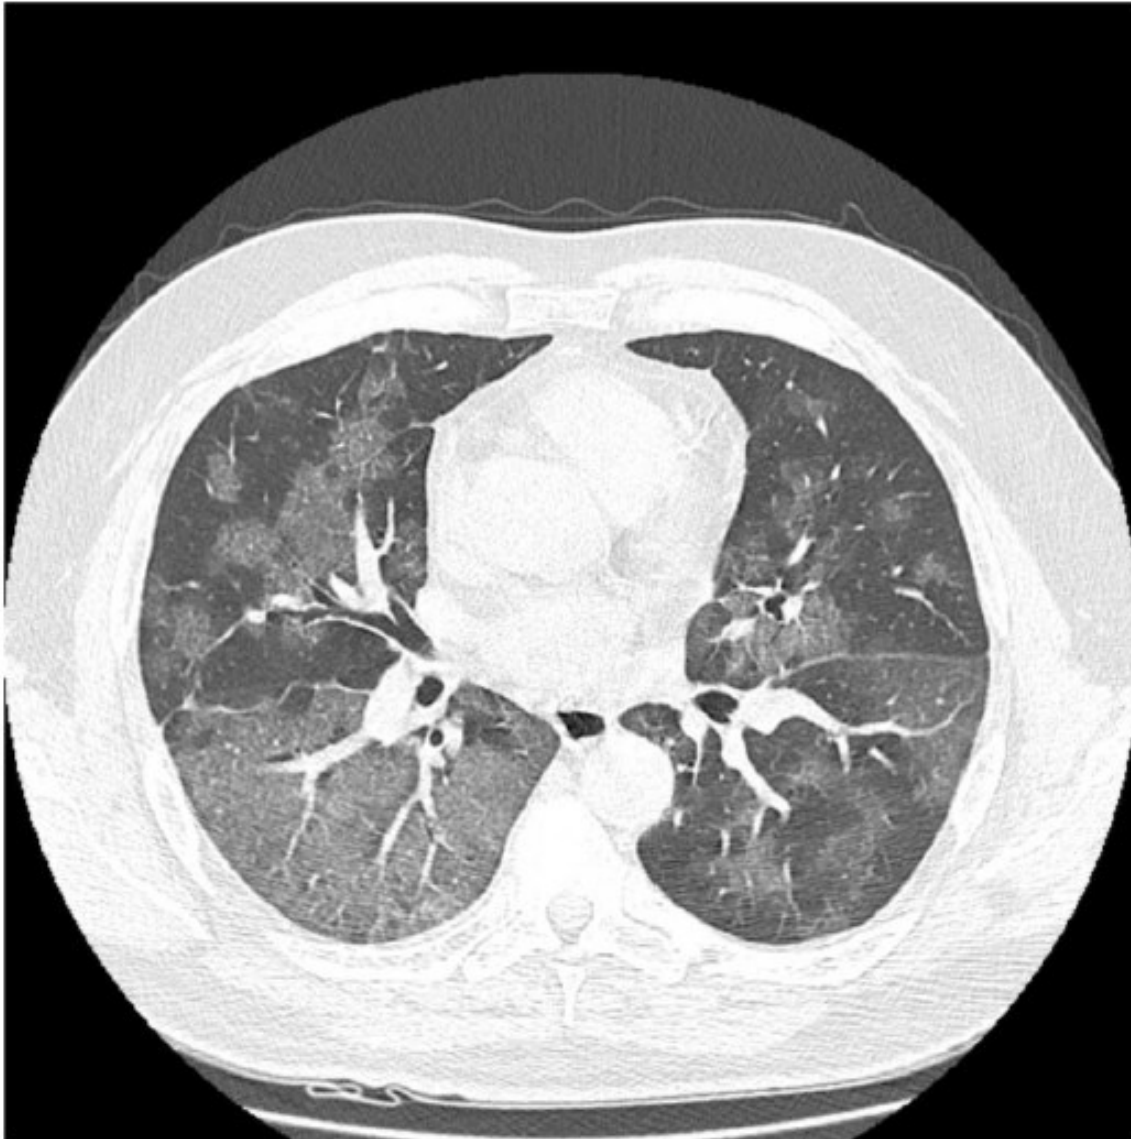

**Supplementary Figure 1 – Representative Computed Tomography image of a COVID-19 patient. Bilateral pathognomonic lung lesion patterns typical of Covid-19 pneumonia are visible.**

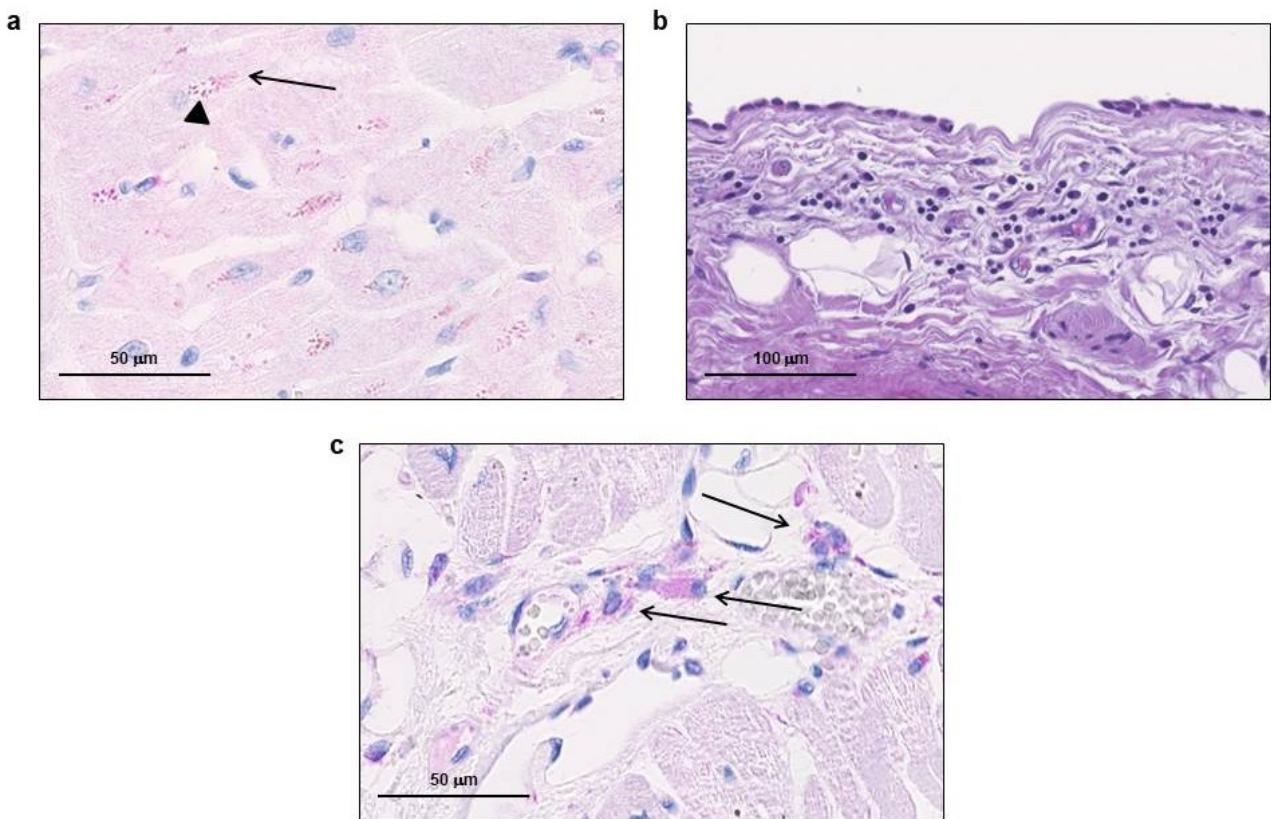

**Supplementary Figure 2 – SARS-CoV-2 nucleoprotein localization in lipofuscin granule area of cardiomyocytes and macrophages, and inflammatory infiltrates in heart samples of COVID-19 patients.** **a)** Representative image of immunohistochemistry on 3 $\mu$ m-slides of formalin-fixed paraffin-embedded left ventricle specimens from COVID-19-positive patient for SARS-CoV-2 nucleoprotein. The lipofuscin granules (in light brown) are indicated with arrowhead, while viral nucleoprotein (in red), localized in same sub-cellular area, is indicated with black arrow. **b)** Haematoxylin-eosin staining on left ventricle specimens from COVID-19-positive patient. The inflammatory infiltrate is clearly localized in sub-epicardial region. **c)** Representative image of immunohistochemistry on left ventricle specimens from COVID-19-positive patient for SARS-CoV-2 nucleoprotein (in red). The high immunoreactive interstitial macrophages are indicated with black arrows. Magnification as scale bars.
